# Supplementary material
Source: ML conference proceedings conference paper supplement (https://aclanthology.org/D18-1425)
Supplement: Attachment [file D18-1425.Attachment.zip]

# Supplementary Material for Spider: A Large-Scale Human-Labeled Dataset for Complex and Cross-Domain Semantic Parsing and Text-to-SQL Task

Tao Yu    Rui Zhang    Kai Yang    Michihiro Yasunaga  
Dongxu Wang    Zifan Li    James Ma    Irene Li  
Qingning Yao    Shanelle Roman    Zilin Zhang    Dragomir R. Radev

Department of Computer Science, Yale University

{tao.yu, r.zhang, k.yang, michihiro.yasunaga, dragomir.radev}@yale.edu

## 1 SQL Hardness Criteria

For all different evaluation metrics, we would get the scores on all SQL-question pairs. Also, we would like to know the scores on SQL with different hardness levels.

We first define:

- SQL components 1: WHERE, GROUP BY, ORDER BY, LIMIT, JOIN, OR, LIKE, HAVING
- SQL components 2: EXCEPT, UNION, INTERSECT, NESTED
- Others: number of AGG  $> 1$ , number of select columns  $> 1$ , number of where conditions  $> 1$ , number of group by clauses  $> 1$ , number of group by clauses  $> 1$  (no consider col1-col2 math equations etc.)

Then different hardness levels are determined as follows.

- Easy: if SQL key words have ZERO or exact ONE from [SQL components 1] and SQL do not satisfy any conditions in [Others] above. AND no word from [SQL components 2].
- Medium: SQL satisfies no more than two rules in [Others] and do not have more than one word from [SQL components 1]. AND no word from [SQL components 2]. Or, SQL has exact 2 words from SQL components 1 and less than 2 rules in [Others]. AND no word from [SQL components 2]
- Hard: SQL satisfies more than two rules in [Others], with no more than 2 key words in [SQL components 1] and NO word in [SQL components 2]. Or, SQL has  $2 < \text{number key words in [SQL components 1]} \leq 3$  and satisfies no more than two rules in [Others] but

NO word in [SQL components 2]. Or, SQL has no more than 1 key word in [SQL components 1] and NO rule in [Others], but exact one key word in [SQL components 2].

- Extra Hard: All others left.
- All: just use all SQL-question pairs to compute different scores listed below.

For all SQL-question pairs labeled with different hardness levels, you are going to compute scores based on below different evaluation metrics.
